# Supplementary material for: Association Between Maternal Weight Gain in Different Periods of Pregnancy and the Risk of Venous Thromboembolism: A Retrospective Matched Case-Control Study
Source: Research Square preprint supplement (doi:10.21203/rs.3.rs-1133612/v1), 2021-12-03
Supplement: Supplementary file 1 [file 8a9d77743945d5a208986062.docx]

Table S1 Gestational weight gain at different periods of pregnancy.

|  | **Control**  **(n=302)** | **PE**  **(n=99)** | **DVT with PE or without PE**  **(n=52)** | **All VTE**  **(n=151)** |
| --- | --- | --- | --- | --- |
| **Total GWG in pregnancy by BMI categories** | | | | |
| All women | 13.0±4.4 | 14.3±5.2 | 11.9±4.7 | 13.5±5.1 |
| Underweight (< 18.5 kg/m2) | 13.7±3.6 | 15.5±5.7 | 22.1±4.9 | 17.2±6.0 |
| Normal weight (18.5-24.9 kg/m2) | 13.2±4.3 | 14.6±4.7 | 12.3±4.2 | 13.9±4.7 |
| Overweight and obese (≥ 25 kg/m2) | 11.4±5.3 | 12.0±6.6 | 9.3±3.6 | 10.7±5.5 |
| **GWG in early pregnancy by BMI categories** | | | | |
| All women | 0.6±2.3 | 1.5±2.5 | 0.8±1.7 | 1.3±2.3 |
| Underweight (< 18.5 kg/m2) | 1.2±2.4 | 2.8±3.1 | -0.9 | 1.9±3.1 |
| Normal weight (18.5-24.9 kg/m2) | 0.6±2.3 | 1.5±2.7 | 0.7±1.6 | 1.3±2.4 |
| Overweight and obese (≥ 25 kg/m2) | -0.3±2.4 | 1.1±1.5 | 1.4±2.1 | 1.2±1.8 |
| **GWG in mid pregnancy by BMI categories** | | | | |
| All women | 6.6±2.8 | 7.0±2.8 | 6.1±2.4 | 6.7±2.7 |
| Underweight (< 18.5 kg/m2) | 7.5±1.6 | 10.9±1.4 | 10.8 | 10.9±1.0 |
| Normal weight (18.5-24.9 kg/m2) | 6.6±2.9 | 6.9±2.7 | 6.6±2.1 | 6.8±2.5 |
| Overweight and obese (≥ 25 kg/m2) | 5.9±3.0 | 6.6±3.2 | 4.2±2.2 | 5.5±3.0 |
| **GWG in late pregnancy by BMI categories** | | | | |
| All women | 6.2±2.6 | 6.5±3.1 | 5.0±2.9 | 6.0±3.1 |
| Underweight (< 18.5 kg/m2) | 6.0±2.1 | 5.3±2.3 | 8.4±0.5 | 6.1±2.4 |
| Normal weight (18.5-24.9 kg/m2) | 6.2±2.7 | 6.7±3.0 | 5.1±3.0 | 6.2±3.1 |
| Overweight and obese (≥ 25 kg/m2) | 6.4±2.8 | 5.4±3.6 | 4.3±2.7 | 4.9±3.2 |

Abbreviations: BMI: body mass index; DVT: deep venous thrombosis; PE: pulmonary embolus; VTE: venous thromboembolism.

Table S2 Risk assessment for venous thromboembolism (VTE)

| **Risk factors for VTE** | **Score** |
| --- | --- |
| **Pre-existing risk factors** | |
| Previous VTE (except a single event related to major surgery) | 4 |
| Single previous VTE related to major surgery | 3 |
| High-risk thrombophilia: antithrombin deficiency; double heterozygous for prothrombin G20210A mutation and factor V Leiden; factor V Leiden homozygous or prothrombin G20210A mutation homozygous | 3 |
| Medical comorbidities e.g. cancer, heart failure, active SLE, IBD or inflammatory polyarthropathy, nephrotic syndrome, type I DM with nephropathy, sickle cell disease, current IVDU | 3 |
| Low-risk thrombophilia: factor V Leiden heterozygous; prothrombin G20210A heterozygous; protein C or protein S deficiency | 1 |
| Family history of unprovoked or estrogen-provoked VTE in first-degree relative | 1 |
| Age ≥35 | 1 |
| BMI 28-34.9kg/m2 | 1 |
| BMI ≥35 kg/m2 | 2 |
| Parity ≥3 | 1 |
| Smoker | 1 |
| Varicose veins of lower limb | 1 |
| IVF/ART | 1 |
| Multiple pregnancy | 1 |
| prediabetes or GDM (using insulin) | 1 |
| Current pre-eclampsia/eclampsia | 1 |
| Placental abruption | 1 |
| **Obstetric risk factors** | |
| Elective caesarean section | 1 |
| Caesarean section in labor | 2 |
| Hysterectomy | 2 |
| Preterm delivery in this pregnancy (< 37+0 weeks) | 1 |
| PPH > 1000 ml or blood transfusion | 1 |
| Stillbirth in this pregnancy | 1 |
| Operative delivery, e.g. forceps delivery, hydrostatic intrauterine balloon tamponade | 1 |
| Prolonged labour (> 24 hours) | 1 |
| **Transient risk factors** | |
| OHSS | 4 |
| Hyperemesis | 3 |
| Any surgical procedure in pregnancy or puerperium except immediate repair of the 3 perineum, e.g. appendicectomy, postpartum sterilization | 3 |
| Immobility ≥7 days | 2 |
| Immobility ≥2 days | 1 |
| Current systemic infection | 1 |
| Dehydration | 1 |

Abbreviations: ART assisted reproductive technology; IVF in vitro fertilisation; OHSS ovarian hyperstimulation syndrome; VTE venous thromboembolism; PPH postpartum hemorrhage; BMI based on booking weight; LMWH low-molecular-weight heparin; DM = diabetes mellitus; IVDU intravenous drug user; IBD inflammatory bowel disease; GDM gestational diabetes melitus;

• If single score ≥ 3 antenatally, consider thromboprophylaxis from the first trimester or pre-pregnancy to 24 hours before delivery.

• If single score＜3, total score ≥ 4 antenatally, consider thromboprophylaxis from the first trimester to 24 hours before delivery.

• If single score＜3, total score ≥ 3 antenatally, consider thromboprophylaxis from 28 weeks to 24 hours before delivery.

• If total score ≥ 2 postnatally, consider thromboprophylaxis for at least 4 days

• If total score ≥ 3 postnatally, consider thromboprophylaxis for at least 7-10 days.
